# Supplementary material for: eIF4A/PDCD4 Pathway, a Factor for Doxorubicin Chemoresistance in a Triple-Negative Breast Cancer Cell Model
Source: MDPI journal article supplement (doi:10.3390/cells11244069), 2022-12-15

# **eIF4A/PDCD4 pathway, a factor for doxorubicin chemoresistance in a triple-negative breast cancer cell model**

Alina González-Ortiz<sup>1,2&</sup>, Angel Pulido-Capiz<sup>1,3&</sup>, César Y. Castañeda-Sánchez<sup>1,2</sup>, Esmeralda Ibarra-López<sup>1,2</sup>, Octavio Galindo-Hernández<sup>1,2</sup>, Maritza Anahí Calderón-Fernández<sup>1,2</sup>, Leslie Y. López-Cossio<sup>1,2</sup>, Raúl Díaz-Molina<sup>1,2</sup>, Brenda Chimal-Vega<sup>1,2</sup>, Nicolás Serafín-Higuera<sup>4</sup>, Iván Córdova-Guerrero<sup>5</sup>, Victor García-González<sup>1,2\*</sup>

<sup>1</sup> Departamento de Bioquímica, Facultad de Medicina Mexicali, Universidad Autónoma de Baja California, Mexicali 21000, Baja California, México.

<sup>2</sup> Laboratorio Multidisciplinario de Estudios Metabólicos y Cáncer, Universidad Autónoma de Baja California, Mexicali 21000, Baja California, México.

<sup>3</sup> Laboratorio de Biología Molecular, Facultad de Medicina Mexicali, Universidad Autónoma de Baja California, Mexicali 21000, Baja California, México.

<sup>4</sup> Facultad de Odontología Mexicali, Universidad Autónoma de Baja California, Mexicali 21000, Baja California, México.

<sup>5</sup> Facultad de Ciencias Químicas e Ingeniería, Universidad Autónoma de Baja California, Tijuana, México.

<sup>&</sup>Equal contribution

<sup>\*</sup>Corresponding author

## Supplementary figures

**Sup. Fig. S1.** Behavior of sensitive variant F. **A)** MTT assay in parental cells and variant F under increasing doxorubicin (Dox) concentrations, mean values are presented ( $n = 6$ , mean  $\pm$  SD), \* $p < 0.001$ , \*\* $p < 0.05$ , respect to parental cells. **B)** XBP1s expression under salubrinal (Sal) and Dox treatments.  $\beta$ -actin was used as a loading control. **C)** Analysis of Dox treatment (500 nM) through flow cytometry.

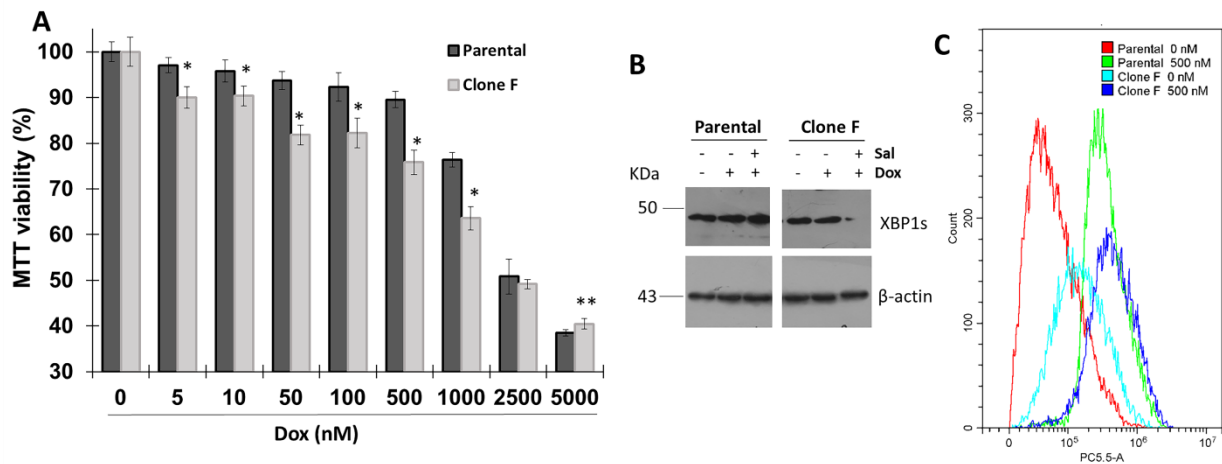

**Sup. Fig. S2.** Localization of BiP in extracellular media of parental and variant B cells.

Identification by western-blot of BiP in 10X concentrated supernatant media of parental and variant B cells under the Doxorubicin (Dox) treatment (100 nM) and concomitant Salubrinal (Sal) (25  $\mu$ M), Cryptotanshinone (Cry) (25  $\mu$ M), and Tunicamycin (Tum) (1  $\mu$ g/mL). Coomassie stain on PVDF membranes and  $\beta$ -actin were used as loading controls.

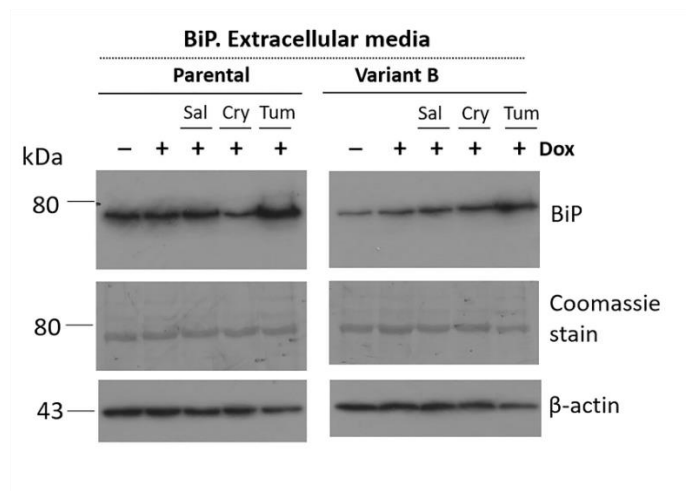

**Sup. Fig. S3.** Localization of XBP1s in extracellular media of parental and variant B cells. Identification by western blot of XBP1s in 10X concentrated supernatant media of parental and variant B cells under LDL (25  $\mu\text{g}/\text{mL}$ ) and Doxorubicin (Dox) (100 nM) treatment. Coomassie stain was used as a loading control.

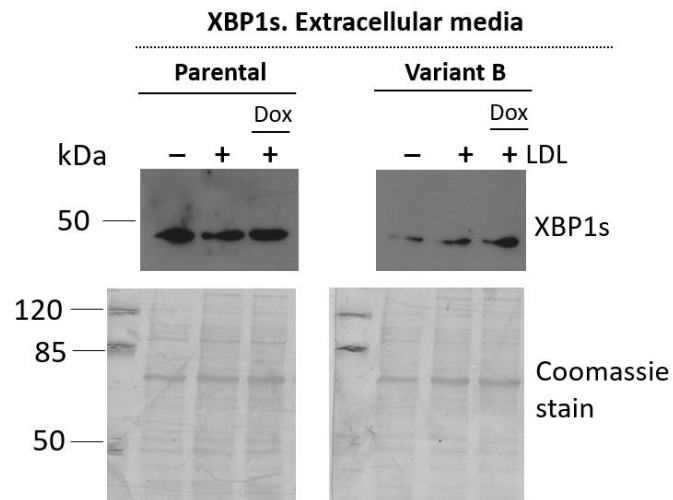

**Sup Fig. S4.** Phenotypic characterization of parental and variant B cells under concomitant Cry/Dox and Tum/Dox. **A)** Effect of concomitant Dox (100 nM) treatment with Cryptotanshinone (Cry) (25  $\mu$ M) and Tunicamycin (Tum) (1  $\mu$ g/mL) by quantification of MMP-9 collagen degradation. Results are expressed as a percent of control. Employing the same conditions, representative images of optical microscopy. In parental cells, a representative image corresponding to control (**B**), Cry plus Dox treatment (**C**), and Tum plus Dox treatment (**D**). The same assays showed in variant B, control (**E**), Cry plus Dox treatment (**F**), and Tum plus Dox treatment (**G**).

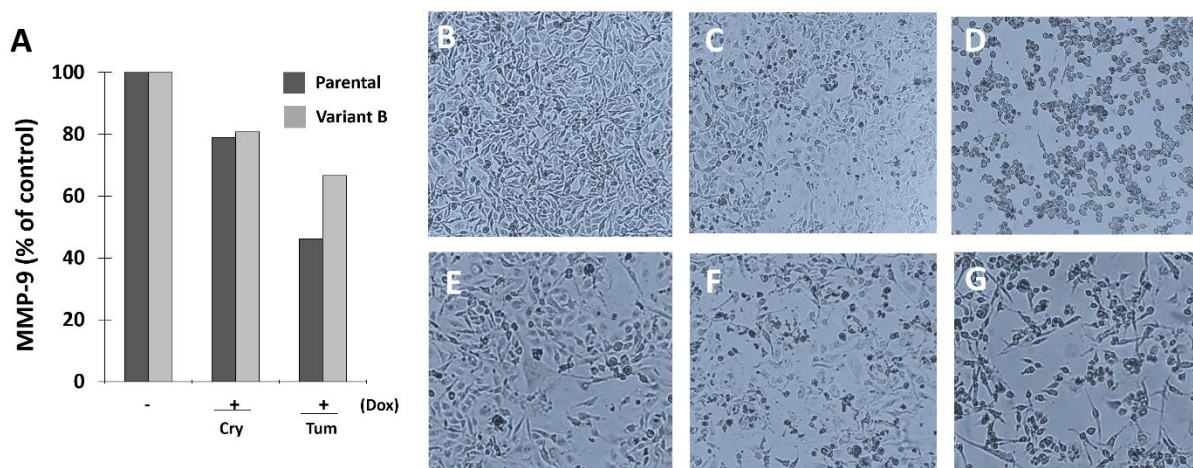

Supplement: s1 [file s1]
